# Supplementary material
Source: bioRxiv or medRxiv preprint supplement (https://www.biorxiv.org/highwire/filestream/123087/field_highwire_adjunct_files/2/380378-3.pdf)
Supplement: Supplementary file [file 380378-3.pdf]

**SUPPLEMENTARY INFORMATION FILE**

**Damage-induced reactive oxygen species enable regenerative signalling  
by the rapid repositioning of Hedgehog expressing cells.**

**Romero *et al.***

**Supplementary Table 1. RNA in situ probe information**

| gene         | sequence                                                                                                                                                                                                                                                                                                                                                                                                                                                                                                                                                                                                                                                                                                                                                                                                                                                                                                                                                                                                                                                                                                                                                                                                                                                                                                                                                                                                                                                                                                                                                                                                                                                                                                                                          |
|--------------|---------------------------------------------------------------------------------------------------------------------------------------------------------------------------------------------------------------------------------------------------------------------------------------------------------------------------------------------------------------------------------------------------------------------------------------------------------------------------------------------------------------------------------------------------------------------------------------------------------------------------------------------------------------------------------------------------------------------------------------------------------------------------------------------------------------------------------------------------------------------------------------------------------------------------------------------------------------------------------------------------------------------------------------------------------------------------------------------------------------------------------------------------------------------------------------------------------------------------------------------------------------------------------------------------------------------------------------------------------------------------------------------------------------------------------------------------------------------------------------------------------------------------------------------------------------------------------------------------------------------------------------------------------------------------------------------------------------------------------------------------|
| <i>ihhb</i>  | GAATTCGAGCTCGGTACCCGGGGATCCGGGGGGTCTNAAATTNGGGGGGTC<br>TNA AATTATCGCTAAATATAGCGACAAAGTCACTAAGTTGGCAACNCNGTTCA<br>ACTGACATCAAATTAATTTCAATTTTTGACATTTTTAATGTGTTTTGATGTCGT<br>TTGACATCAAGGTGACCTTTTACATCACAACCCTGAGCTTGTGATCATCTCTT<br>TTGACAACCTCTCTCCACCAATCCCTGCGTTTTCAATCCATCATCTCTCAG<br>TTGCCTCTAAGGCCAAAGGGTGAAGAGTTCTGAGTCTAGCAGTAGTTTTCC<br>CAAACCTATCAGGACCTGAGAGTACCAGTGTAAAGCCATTCTTAAGGACCTGAT<br>CTGGTCCGGTCCAGCTATACAGCAAGCGTAGAGGTGAAAAGCCCAATGAGC<br>AAGTCTTTGCCTGTTCAACCGCAGCATAACAAGAGGTGAGCACATCGTTCACC<br>ACTACAGTCCCATGAGCAGTAAGTGGAGGGTATAACCCCTGGTCTCCCGAA<br>CCCCAACATGAGTGATCTGTGAAAACGCTTCCTGAGTTTACCCAGCAGCAA<br>CACTGACCCACTTGAGCATCGCTGGCAAATATCGTCCGGACTGCTCCTGGTT<br>TGGGTTCCCCCTGTTGGAGCAGTTTCCAACCCTCATAAACAGTAAATGAGC<br>CGCTGTTAAAGACACGCTGGCCCCATCTCAGTGGGATCACATAGAAGTGC<br>TTCTGGGTAATGGGGCGACGGTCCAAAAGGTGAGGACTTCACTATAGATGA<br>GGTCTCCTGTCCCGTTCGCTTCCCTCAGAGGCCAGAACCAAGTCTCCTGCCTG<br>CAAATCACGGATTTGTCGATGGGAACCATCCTTCATGGTCACCAGAGCCCTT<br>CCAGGAAAACAGCCTCCTGTTTTGCTGCTACTGAATGCTCTGATTTGACT<br>GCAGTGACGTGGCCTTTGGATTCGTAATAGACCCAGTCGAAGCCTGCTTCC<br>ACCGCAAGACGAGCCAGCATGCGGTACTTGTTCGATCGCGGTCCGAGGTA<br>GTAATGTCCACCGCTCTGCCCTCATAATGCAGAGATTCTTCAGAGTGTAGTCC<br>GTCCTCATCCAGCCCTCCGTCACACGCAGACGCACACCCGGCCACAGGTT<br>CATCACCGAGATGGCCAGAGAGTTCAGCTTATCCTTGCAGCGCTGCGTCATC<br>ATGCGGTCCGCACCTGTGTTCTCCTCATCCTTGAAGATGATGTCCGGGTTGT<br>AGTTTGGGGTCAAGCTCTTTAAAGCGCTCGGAGCTGGGGGTGACCTTCCCTC<br>ATATCTCCCGCTCGCCCCAGCGTTTTCTCGGCTACGTTCCGACTGAACTGC<br>TTATAGGCGAGAGGCGTGAGTTTTCCGCGGAGTCCGTCTCTTGCCGTAACCTC<br>TGCCCGGTCCACAGCCGTGCTACGCCGGCGAGAAAGCCAAGATGAAGCCGG<br>TGAGGAGCGCCGCCCGCGTGGAGAGTCTCATTCTAGAGTCGACCTGCAGGC<br>ATGCAAGCTTATTCCCTTAGTGAGGGTAAATTTATATAGCTTGGCACTGGCC<br>GTCGTTTTAC |
| <i>shha</i>  | GCCACGTTCCCATTTGATACAGGAGCCTGGAGTACCAGTGGACCCCTCCTG<br>TTGTA AAGTTCGATTGGACCGACTGCTGGAGTTTTGGGGGAACAGGAATGAT<br>GACACGTAATAATAGAGCCTGGCGGGCGCGAAGGCCAAATGCGCAAGCCCC<br>TGGTCTCTATTACGGCGTAACAGGACGCCAGTATTCTGTGACCAACAATGG<br>TCCATGTGCAGTCACTGGTGCGAACGAGCCCCGCTGCTCCTCCGTGTATAT<br>CCGCTGCACGATGACAGATTTAAGCTGACCGCTATCATCAACAACCATCACCT<br>TTTGTCCGGCTCTGACACTGCTGGCATAACGCGGCGGTGATGGTGTGGAGATC<br>TTCCGTTGAGTTGTGCGAGGACAAAAGGAGGTGAGCGGCGGTGAGGGTGTG<br>CTTTTCAACGGGTTCTTGCCTTTCTATGACGTA A A C A C A C G T C G C G T C G T G G<br>AGTCTCGGTCTGTGAACATGATGAAGTTCGCTGAACACCAGGTTTCCCGCGCT<br>GTCTGCCGCCAGCACCTTGTCTCCGGGGTTCAGGTCCTTACGGCCTTCTGT<br>CCTCCGTCTGGAGCGAGACCAGAGCCGAACCTGGGAAACAGCCCCAGAT<br>TTCGCAGCAACCGAATTTCTGCTTTGACAGAGCAATGAATGTGGGCTTTGGA<br>CTCGTAATAGACCCAGTCAAATCCAGCCTCCACAGCTAGGCGAGACAGTGTG<br>CCGATTTGCTCTTGTCTCGGTCAGAGG                                                                                                                                                                                                                                                                                                                                                                                                                                                                                                                                                                                                                                                                                                                                                                                                                                                                                         |
| <i>ptch1</i> | GGGAGACTGCGGTGAGTTACACGCCATTGGGTCGCTGGAGCTGGGGCTGTG<br>TTCTGGGGGCGAGTTCGCCGTTTTTTCATAATCTTCTTTAGTTTTGATCTTTGTT<br>CTGGAACCAAGATTTTACCTGTGTCTGTGTGAGTCCAGCGATGCGGCGAGC<br>TCGGCTCTTTCTGGAAGCGCGAGGTATTGCGTGTCTGAAACCTTCTCTGTAA<br>AGCTGCGAGCTGGAAACTGGAGTAAATGGTTCGGGGCTTCCGACTTTTTTG<br>GGTTTTCCGTTGACCATCCTTACTTCGGGCTCGGCTGTTTCTTTTTCTTGC GG<br>GCTCGGTTGTGATTGCACTCTGTTATATGTTCCCTGCGTATTGGTGATACGCTG<br>TGGAGTATGAGCCGTAATCAGGGTAGGATTTTGCAGAGTAATTTCCAGAAGAT<br>CCATTGACTCCGTGGTATTGGTACTGATAGGCATTAAGAGTTTTCCCATAGGT                                                                                                                                                                                                                                                                                                                                                                                                                                                                                                                                                                                                                                                                                                                                                                                                                                                                                                                                                                                                                                                                                                                                                                                                                        |

|               |                                                                                                                                                                                                                                                                                                                                                                                                                                                                                                                                                                                                                                                                                                                                                                                                                                                                                                                                                                                                                  |
|---------------|------------------------------------------------------------------------------------------------------------------------------------------------------------------------------------------------------------------------------------------------------------------------------------------------------------------------------------------------------------------------------------------------------------------------------------------------------------------------------------------------------------------------------------------------------------------------------------------------------------------------------------------------------------------------------------------------------------------------------------------------------------------------------------------------------------------------------------------------------------------------------------------------------------------------------------------------------------------------------------------------------------------|
|               | GCCCCGAGTTCGGTGAACAATAGCCATGATGAACTCCTCCGGCAGGGCTGTAA<br>TAGCCAGAATCCGTGGCTGTGGACTCCGGTAGGGTTGGAGAT                                                                                                                                                                                                                                                                                                                                                                                                                                                                                                                                                                                                                                                                                                                                                                                                                                                                                                              |
| <i>msxc</i>   | CATTTTGAATCCTCCGAAAGGACACTGGCAGGACAGGGCGTTATAACAGTTA<br>ATCCAGACGGTGCCGGCCTGCACTGCTGCAGAGATGGTCATGGCCTTGCTG<br>ATATCTCTGGTGAAGACGGCCGCTGCCAGACCGTATTCTGTGTTGTTGGCTC<br>TCTCAATCACTTCTTCAATTGTTTTGAACTTCATGATTTGCTGCACTGGCCCAA<br>ATATCTCCTCCTTGGCGATGCGCATGTGGTCCTTACATTAGAGAAAAGTGTG<br>GGCTCCACGAAGAAGCCTTTAGTAGGAGGAGCTTTGCCTCCACACTCCAGTT<br>TGGCTCCTTCAGTGATGCCACTCTGGATGAGCTCCAGCACACGTCTCTGCTG<br>CTCCTCGCTCACCTGAGGTCCGTGTTTCAGTGGTTGGGTCAAAGGGATTTCCC<br>ACTTTCCTCCTCTGTGCTCTCTCAACACTTCTTCTCACAAAAGTCAATAAATG<br>GGCTCCTCAACAAAGATACGGGAACCAGCAGTGCAGCATTGACCGTTATTGA<br>AGAAAACCCCTGATGGGCCTGTTCTAATGCCAGCTCAAATCAGCATCTGC<br>AAAAATGATGTTGGGACTCTTCCCGGAGCTCCAGCGTGACTCTCTTCAGAT<br>TGCTCTTTCCTGCTGCTTCTTGGATCAGCTTGCTACCTCAGTCGATCCTGTG<br>AACGCCACTTTGTCTATGCCATGTGCGAAGAGATCGCGGCTCCTGCGGTTG<br>GCCCATAGCCTGGCAAAATATTGACGACTCCCGGTGAAACCCAGCCTCTTT<br>GATCAGAGCGCCGAGGTAGAGGCAGGTGAGAGGGGTTTGCTCAGCAGGTTT<br>CAGGACAACCGTGTCCCGCAGCTCAGCGCCGGCCCAATTTCCATGCTGTC<br>ATCACCAGGGGGAAGTTCCAAGGAATGAT |
| <i>raldh2</i> | CATTTTGAATCCTCCGAAAGGACACTGGCAGGACAGGGCGTTATAACAGTTA<br>ATCCAGACGGTGCCGGCCTGCACTGCTGCAGAGATGGTCATGGCCTTGCTG<br>ATATCTCTGGTGAAGACGGCCGCTGCCAGACCGTATTCTGTGTTGTTGGCTC<br>TCTCAATCACTTCTTCAATTGTTTTGAACTTCATGATTTGCTGCACTGGCCCAA<br>ATATCTCCTCCTTGGCGATGCGCATGTGGTCCTTACATTAGAGAAAAGTGTG<br>GGCTCCACGAAGAAGCCTTTAGTAGGAGGAGCTTTGCCTCCACACTCCAGTT<br>TGGCTCCTTCAGTGATGCCACTCTGGATGAGCTCCAGCACACGTCTCTGCTG<br>CTCCTCGCTCACCTGAGGTCCGTGTTTCAGTGGTTGGGTCAAAGGGATTTCCC<br>ACTTTCCTCCTCTGTGCTCTCTCAACACTTCTTCTCACAAAAGTCAATAAATG<br>GGCTCCTCAACAAAGATACGGGAACCAGCAGTGCAGCATTGACCGTTATTGA<br>AGAAAACCCCTGATGGGCCTGTTCTAATGCCAGCTCAAATCAGCATCTGC<br>AAAAATGATGTTGGGACTCTTCCCGGAGCTCCAGCGTGACTCTCTTCAGAT<br>TGCTCTTTCCTGCTGCTTCTTGGATCAGCTTGCTACCTCAGTCGATCCTGTG<br>AACGCCACTTTGTCTATGCCATGTGCGAAGAGATCGCGGCTCCTGCGGTTG<br>GCCCATAGCCTGGCAAAATATTGACGACTCCCGGTGAAACCCAGCCTCTTT<br>GATCAGAGCGCCGAGGTAGAGGCAGGTGAGAGGGGTTTGCTCAGCAGGTTT<br>CAGGACAACCGTGTCCCGCAGCTCAGCGCCGGCCCAATTTCCATGCTGTC<br>ATCACCAGGGGGAAGTTCCAAGGAATGAT |
| <i>axin2</i>  | ATCCGCACACCAGCTTTAGACCTCCTAGACCATTGGGATTCACATGACTGGG<br>GTTCTCGCACCCAGTTCTGACATACTCGAGGTATATGTCCGAGGTCAAAAACA<br>TCTGATAGGCATTCTCCTCCATAGCCGCTGGATCTCCATTTGAGCCTGATCA<br>AACATTGCAGAGTCAATCTGCTGACGCTTAATATTATCCCTAATAAAGGTCTTA<br>GTGGCAGGTTTAAAGCTGCTTGGCCACAATGCTGTTGTTCTCAATATACCGCTT<br>GTAATGGCTTTGGCAACTCTGTGCGTTTTGGTATCCTTGAGGTCCATTTGTC<br>TGAAACCATTGCAGGCAAACCAAAAATCTAAAGTGTCCACACATTTCTCGCGT<br>TCAAGGTATGCCCGGAAAAGTTGAGCACCATCCTGGTCCCGGAGAAGAAAAT<br>GCAAAGATTTGGTCCACCGGGCAAGAGGGGAGTCCGGGGATGCGCTGCCCT<br>CAGGTTCCCAAGTCCATCCTCATCCCTCCTGGCCGTGGAACAACGAAGATC<br>AGCCATAATGGTCTTGACAGGATCCTTCGGTCTCATCATGGCCAGTTTGCTG<br>GGATGGTGGCATGTCGTCTCACCTCTTCC                                                                                                                                                                                                                                                                                                                                        |
| <i>pea3</i>   | CTGCAGGTGCTGCTGCCTCTGTCCGTCTTCCCTTCCCTCTCAGTCTGCGTGG<br>AGCTCATTAAACACAGCCTAAATGACCACAAACGGTTAAGGCATGGATTATA<br>AGATGGATGGATATCTGGACCAGCAAGTGCCTTATACTTTAGCTAATAGGTG<br>CAAGGAAATGGGCCCTAAATAGACTGTTGATGGCGACAAAAGGAAATACA<br>TGGACGCAGAATTACCCCTCAGGAATCTGAAGACCTTTTCAGGATTTAAGC<br>CACTTCAGGAGACCTGGCTCACCGAAGCTCAAGTTCCTGACAGCGATGAGC<br>AGTTTGTTCTGACTTTCACTCAGAGAACTCAGTGGCATTCCACAGCCCGCCT<br>GTGAAGATTAAGAAAGAGCCGCAGAGTCCCGGATCAGACCCAGCCAGTCCT<br>GCAGCCACAAGCAAAGCTTCAGCTACCCCAATGGAGAGCAGTGCTTTACGC<br>CAGTGCCTATGAGCAGAAGAGAGCAGCCGTGGCAGGAGCAGGAGGATCTAA                                                                                                                                                                                                                                                                                                                                                                                                                                            |

|             |                                                                                                                                                                                                                                                                                                                                                                                                                                                                                                                                                                                                                                                                                                                                                                                                                                                                                                                                                                                                                                                                                                                                                                                                                                                                                                                                                                                                                                                                          |
|-------------|--------------------------------------------------------------------------------------------------------------------------------------------------------------------------------------------------------------------------------------------------------------------------------------------------------------------------------------------------------------------------------------------------------------------------------------------------------------------------------------------------------------------------------------------------------------------------------------------------------------------------------------------------------------------------------------------------------------------------------------------------------------------------------------------------------------------------------------------------------------------------------------------------------------------------------------------------------------------------------------------------------------------------------------------------------------------------------------------------------------------------------------------------------------------------------------------------------------------------------------------------------------------------------------------------------------------------------------------------------------------------------------------------------------------------------------------------------------------------|
|             | <p>GAGCTCATGTCCAGGGACGCCATGTCCCCTATGCAGCATTATTCCCCAAA<br/> CCAACAGTGGGAACTCGGCAGGAATCAGGGTATATGAATCCACCCTCAGCCA<br/> GCCAATCCCACGCCTGCCACAGCCACAGTTACCCCATGAACCCAGTTCAG<br/> GTTCCCTTCCGGCTCGGCAGAGATGTGCCACCATTTCGCTTCCAAGGCCAG<br/> GCCCTGCAGCGCATGCATCCTGCCATGCCAGCGGAGGCGGTTACCATCGG<br/> CAACACTCTGACCCCTGCTTGCCTTATCCTCCTCAGCAGACCTTTAAGCAAGA<br/> GTACATGGACCCTCTGTATGACCGAGCGGCCACATTAACGGACCACAGCCT<br/> CAGAGGTTTCTCCTGCCATATGATGGTCAAACAGGAGGCCACCGACTACA<br/> CTTACGAACCTGATGTGCCTGGCTGCCATCCATGTACCATCACAAACGAAGG<br/> CTACTCCAACCCACAGCACAACAGTGAAGGCTACATGTTTGAAAATGATTCCC<br/> GTGTTGTGCCAGAGAAATTTGAAGGTGAGGTGAAACAAGAAGGGGGCAGTGT<br/> GTTTCGTGAAGGTGCCCCCTATCAGCGTCGTGGCTCACTTCAACTATGGCAG<br/> TTCTTGTTGCCCTTCTTGATGACCCAGCAATGCCACTTCATCGCATGGAC<br/> GGCCGTGGCATGGAATTCAAACTCATTGAGCCAGAGGAGGTGGCAAGACT<br/> CTGGGGATGCAGAAGAACCGTCCAGCCATGAACTATGACAAACTGAGTCGC<br/> TCTTTCGTTACTATTATGAGAAGGGAATTATGCAAAGGTGGCTGTTGAGCG<br/> TTATGTTTACAAATTTGTGTGAGCCAGAAGCTTTGATAACCTTGGCTTTTCC<br/> CGACAATCAGCGGCCAAGTCTGAAGGCGGAATTTGAGCGCTACGTCAACGA<br/> GGAGGACACTGTGCCACTGTCCACCTCGATGAGGGAGTTTCTTACCCTCCC<br/> GAACCAGCTGCCACCAACATGGGCCCTCAGCCCTACTCCAAAGGCTACATGT<br/> ACTAATGCCACCGACATTCTCCTTTGTTTCCCATCCCAGTTTACCACCCGCTG<br/> CACCTATTGCACATGCCACCCCATCCTTGTATATAAGGCTATGTTTTATGT<br/> TTTTGTTTTGATTAATTAATCTCATTAGGGACTCTGCATTCTCTCACTTCTGA<br/> GGCCTATCTAATCTAAACACAATACTGTGGTTCAAGAGATTGCTTAATAAAC<br/> CAATATTACTACTATAAACGAGGGGGCCCGTA</p> |
| <i>tcf7</i> | <p>ACCAGTCCGTCTGTTGGTTCAGGCCGAAGCGAGCGCGGCATTTCTTTGGAGA<br/> GCCAGGCCCTGTACTGGAGTCTCTGCTGCTTGTCCCCTTCTCCGCTTCTTTT<br/> TGCCCAAAGCACTCACGTAGTTGTCACGGGCGGACCAGCTGGGGTAGAGCT<br/> GCACGTGCAGCTGCCGCTCCTTACGGGCCAGCTCATAGTACTTGGCCTGTTT<br/> CTCACGGGTGAGAGCGTGCCACCGGCCGCCAGGATCTGGTTGATGGCGGC<br/> GCTCTCCTTCAAGTGTGCACTCTGCGATCACTTTAGCGCGCATCTCCTTATGT<br/> ACAGCATGAACGCATTGAGAGGCTTCTTGTATCACCAGGCTTCTTGGGCTCCTT<br/> CTCCCGCTTGGCTCCGCATGAGACTTGTATAAATGCTCCTGTGCAACTGAT<br/> CGTGCTCCTGCTTTCCTGAAGGGGGCACTATAGCGGGGTGAGGGATTCTGT<br/> GGGGTGCATACCGGACTGCAGCATCAGAGAGTGAGAGAACCAGTTCATGGA<br/> GGGCGTGATCTGACCCTGAGGCAGCGAGTAGAAACCCGAAATCTCCTGCGT<br/> CTGATGTCTGTGAACACCTGGTTTCTGTCTCCTCCGTCTGTGGGCATGTGTGT<br/> GGACTGGGGTTGAAGTGTTTCATACGGCAGCAGCGGCGTCAGCGGATGCATC<br/> CCCTGTTGGACCACCGACACCTTGTGGAAAGGTGGAGAGACGGGTCCGTTG<br/> GGCAGATACGGCTCCGGCAGCATCAGGAACGGGTATCCGGAGTACGGCGCT<br/> TTATACATCCCTCCATCGTGATGTTTGGGCACGTCGTCCAGATGTTCTCGTTT<br/> ATCGCTGTAGATCCTCTGCTGCTCCTGCTGTCTCCTTCTGATCACGGCTGGG<br/> CTCTGGCTGATCTCGGTCTCGCTGACCAGTGATGA</p>                                                                                                                                                                                                                                                                                                                                                                                                         |
| <i>myod</i> | <p>CAAAGAAACCCTCCGAGGTCCTGCGAATTTTAGACTGTAGTTTTGAAACGTAC<br/> GTTATTTCCGGATCTGAAGGACTTTGTCTTACTATTCCATAATTTTGGTTTTTATT<br/> TTTTTTACAAATTTACTACTTTGGAAACATTCAAGTACATTTCTTGCTTTTTAAA<br/> CTTTAACACAAAAAAGATGGAGTTGTGGATATCCCCTTCCCCATCCCATCAG<br/> CTGATGACTTCTACGACGACCCTTGTCAACACCAACGACATGCACTTCTTT<br/> GAAGACTTGGACCCAGGCTTGTTCACGTGAGCCTGCTCAAACCCGACGAGC<br/> ATCACCATCGAGGACGAGCACGTGAGGGCGCCAGTGGGCATCATCAGG<br/> CCGGCAGGTGCCTACTGTGGGCATGCAAAGCTTGCAAGAGAAAACTACCAA<br/> TGCTGACCGTCGCAAAGCCGCCACCATGAGGGAGAGGAGGCGACTGAGCAA<br/> GGTCAACGACGCTTTTCGAGACCCTCAAGAGATGCACGTCCACCAACCCGAAC<br/> CAGAGGCTGCCAAAGTGGAGATTCTGAGAAACGCCATTAGTTATATCGAGT<br/> CTCTGCAGGCTCTTCTCAGAAGTCAAGAGGATAACTACTATCCCCTTCTGGAA<br/> CATTACAGTGGAGACTCTGATGCTTCCAGTCCGAGATCCAACCTGCTCTGATG<br/> GCATGATGGATTTTATGGGCCAACGTGTCAGACGAGAAGACGGAACAGCTA<br/> TGACAGCTCTTACTTCAATGACACACCAAATGCTGACGCACGGAATAATAAAA<br/> ACTCAGTGGTGTGAGTTTGGATTGTCTGTCCAGCATCGTGGAGCGAATTTT<br/> CACAGAGACTCCTGCATGTCCCCTGCTGTGAGTACCGGAGGGGCACGAAGA</p>                                                                                                                                                                                                                                                                                                                                                                                                                                              |

|               |                                                                                                                                                                                                                                                                                                                                                                                                                                                                                                                                                                                                                                                                                                                                                                                                                                                                                                                                                                                                                                                   |
|---------------|---------------------------------------------------------------------------------------------------------------------------------------------------------------------------------------------------------------------------------------------------------------------------------------------------------------------------------------------------------------------------------------------------------------------------------------------------------------------------------------------------------------------------------------------------------------------------------------------------------------------------------------------------------------------------------------------------------------------------------------------------------------------------------------------------------------------------------------------------------------------------------------------------------------------------------------------------------------------------------------------------------------------------------------------------|
|               | <p>GAGCCCGTGTTCCTCCGCATGAGGGATCTGTCCTGAGTGACACCGGAACCAC<br/> CGCACCGTCCCCGACCAGCTGCCCTCAACAGCAGGCTCAGGAAACCATTTAT<br/> CAAGTGCTTTAAAATTCTGCAACATTTCAAACAAATTGAAAAAGACAATCTGA<br/> ATGAAGAACTTTTCAGCAGAAAAAGGCGAATCCGACCTTTAACGACAAAAGAA<br/> AGACTTTTGTATCCACTGCTGGAAACTAGGAAAGAATGCTTTCTTTCTTTCTTT<br/> TTTCTTTCTTTCTTTCTTTCTTTCTTTCTTTCTTTCTTTCTTTCTTTCTTTCT<br/> TTCTTTCTTTCTTTCTTTCTTTCTTTCTTTCTTTCTTTCTTTCTTTCTTTCTTT<br/> TCTTTCTTTCTTTCTTTCTTTCTTTCTTTCTTTCTTTCTTTCTTTCTTTCTTT<br/> CTTTCTTTCTTTCTTTCTTTATGCGGTGGAAAATGTAATTCGAATATGAGAAAA<br/> GACTCAGCAGATCAGCAGAAGTGAGTTTTTAACTAAGCTTATTTATATTGTTA<br/> TATCCACGTGAAAATGTGACCATATTTTTTCCCTTTGTGAATATATTTCTGTC<br/> ACCATCACCTTTTATTTTCCCTAATTTTACGGAAAAATCGTAATCCAGATAC<br/> GAATAGTAGGACCATTTTGTATATGTGTAATAAGATCTGTTTTGTTAAAGCG<br/> ACGAAAACGAACAAACATATTATTGATTTAATGATGCCTGTTTGAACACTAG<br/> TTTGTGTGTCTTGTGTTAACTTTATATTTATACTTCTTAAACGAGTGAATGAC<br/> GGATAAATAAAAAACAACATTTTATACTGGAAAA</p>                                                                                      |
| <i>wnt10a</i> | <p>CTTTGACCCCATCCTCAATGCCAACACGGTGTGTTTGACCCTGCCAGGCCTG<br/> ACAAAGAAACAGCTGGACGTTTGTATGAGAAATCCAGATGTGACGGCCTCAG<br/> CCATACAGGGCATTTCAGATTGCCATTCATGAGTGCCAGCATCAGTTCCGAGG<br/> GCACCGCTGGAAGTCTCAAGTTTGAGACCAGGAATAAAATCCCTTACGAG<br/> AGTGTGGTCTTCAGCAGGGGTTTCAGAGAAAGCGCATTTGCTTATGCCATTG<br/> CTGCAGCTGGTGTGGTGCATGCCGTGTCTAATGCCTGTGCCATGGGCAAACT<br/> GAAGGCCTGCGGCTGTGACGAGAAGCGCAGAGGAGACGAGGAGGCGTTCA<br/> GAATCAAGCTCAACCGTCTGCAGCTGGAGGCCATCAATCGAGGCAAAGGCAT<br/> GGTGCACGGTGTGATGGAGCACTTCCCTGCCGAGGCACTCGGCCCCAGGA<br/> CTCCTGGGAGTGGGGCGGCTGCAGTCCAACGTGGAGTATGGGGAGCGCTT<br/> CTCCAAGGACTTCCCTGGACTCCCGCAGACGTACAGAGACATTCACTCCAGG<br/> ATGAGACTTCATAACAACAGAGTTGGCAGGCAGGTTGTGGTGGACCACATGA<br/> GGAGGAAATGCAAATGCCATGGTACATCGGGCAGCTGTCAGCTGAAGACCTG<br/> TTGGCAGGTGACTCCAGAGTTCAGAACGGTGGGCTCGCTGCTGAAGGAGCG<br/> CTTCAACGTGGCCACGCTAATCAAAGCCACAACAGAAACACAGGTCAGGTG<br/> GAGAATGCCACCACACACACCGGCGGAGAGCCAACATCAATGACCTGGTCT<br/> ACTTCGAGAAGTCCCCTGACTTCTGTGAGAGGGACCTTGGGTCCGACTCTGC<br/> CGGGACGCAAGGCCGGATCTGTAACA</p> |
| <i>fgf10a</i> | <p>GTTCTGTGTTCCGGCTCTGCCTGTGGCCTGCCATGACACCCACAGGGCCATC<br/> CGTGCCCCGAGGGGCACCAACTCCTCATCGTCTGCCGTGGTGGGGCGGCAT<br/> GTGCGCAGCTACAACCACCTCACGGGGGACGTGCGCAGGAGGAAACTCTTC<br/> TCCTACCAGAAGTTCTTTCTCAGGATCGATAAGAACGGAAAAGTCAATGGCAC<br/> CAAAGCAAGGACGATCCGTACAGTACACTCGAAATCAAGTCTGTGGATGTG<br/> GGCATCGTTGCCATCAAGGGGATTCAAAGCAATTACTACCTTGAATTAACAA<br/> GAAAGGGGTGGTCTACGGGGCGAGGGATTTTCGGCATTGACTGCAAGCTGAT<br/> AGAGAGGATAGAGGAGAACAGGTACAACACCTATGCCTCGGCAGAATGGATG<br/> AACAGAAGAAGCACATGTTCTAGGTCTGAGCGCCAACGGGAGGCCGATG<br/> AGGGCCAAAAAGACCCGGAGAAAAAACACAGCCACACACTTTCTCCC</p>                                                                                                                                                                                                                                                                                                                                                                                                                                                       |
